# Supplementary material for: Plasma fibroblast growth factor 21 levels increase with ectopic fat accumulation and its receptor levels are decreased in the visceral fat of patients with type 2 diabetes
Source: PubMed Central journal article supplement — BMJ Open Diabetes Res Care. 2019 Nov 17;7(1):e000776. doi: 10.1136/bmjdrc-2019-000776 (PMC6861080; doi:10.1136/bmjdrc-2019-000776), 2019-11-17

**Supplemental Figure 1** – Plasma fibroblast growth factor 21 levels according to glucose metabolism status. A: Subjects who referred from a health examination center (Cohort 1); B: Subjects who underwent coronary artery bypass graft surgery (Cohort 2). NGT, normal glucose tolerance; PreDM, pre-diabetic patients; T2DM, patients with type 2 diabetes mellitus. <sup>a, b</sup> Significant differences ( $P < 0.05$ )

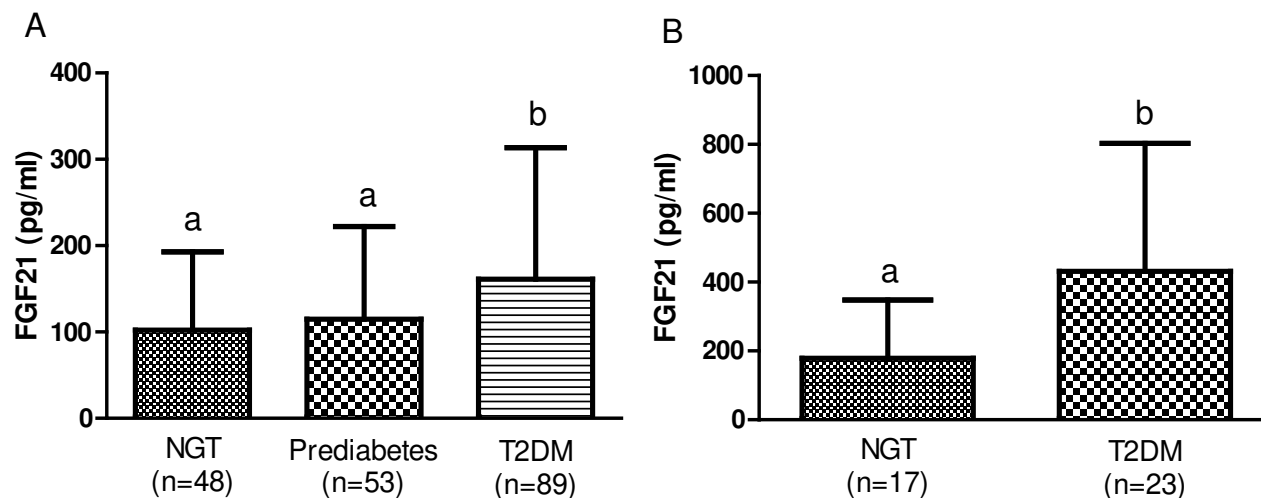

**Supplemental Figure 2** – Correlations among various types of ectopic fat and FGF21 levels. A: All groups; B: normal glucose tolerance (NGT); C: pre-diabetic patients (preDM); D: type 2 diabetes mellitus group (T2DM).

A

| r<br>p-value         | Subcutaneous<br>fat | Visceral<br>fat | Epicardial<br>fat | Intrahepatic<br>fat | Intramuscular<br>fat | Plasma<br>FGF21 |
|----------------------|---------------------|-----------------|-------------------|---------------------|----------------------|-----------------|
| Subcutaneous<br>fat  |                     | 0.206           | 0.156             | 0.226               | 0.399                | 0.029           |
| Visceral<br>fat      | 0.005               |                 | 0.612             | 0.321               | 0.319                | 0.150           |
| Epicardial<br>fat    | 0.036               | <0.001          |                   | 0.246               | 0.309                | 0.189           |
| Intrahepatic<br>fat  | 0.009               | <0.001          | 0.004             |                     | 0.112                | 0.117           |
| Intramuscular<br>fat | <0.001              | <0.001          | <0.001            | 0.199               |                      | 0.104           |
| Plasma<br>FGF21      | 0.722               | 0.061           | 0.019             | 0.218               | 0.195                |                 |

B

| r<br>p-value         | Subcutaneous<br>fat | Visceral<br>fat | Epicardial<br>fat | Intrahepatic<br>fat | Intramuscular<br>fat | Plasma<br>FGF21 |
|----------------------|---------------------|-----------------|-------------------|---------------------|----------------------|-----------------|
| Subcutaneous<br>fat  |                     | 0.056           | -0.129            | 0.170               | 0.523                | -0.183          |
| Visceral<br>fat      | 0.707               |                 | 0.690             | 0.330               | 0.274                | 0.035           |
| Epicardial<br>fat    | 0.389               | <0.001          |                   | 0.121               | 0.027                | 0.130           |
| Intrahepatic<br>fat  | 0.315               | 0.046           | 0.482             |                     | 0.106                | -0.104          |
| Intramuscular<br>fat | <0.001              | 0.060           | 0.859             | 0.532               |                      | -0.072          |
| Plasma<br>FGF21      | 0.264               | 0.831           | 0.435             | 0.586               | 0.663                |                 |

C

| r<br>p-value         | Subcutaneous<br>fat | Visceral<br>fat | Epicardial<br>fat | Intrahepatic<br>fat | Intramuscular<br>fat | Plasma<br>FGF21 |
|----------------------|---------------------|-----------------|-------------------|---------------------|----------------------|-----------------|
| Subcutaneous<br>fat  |                     | 0.225           | 0.147             | 0.338               | 0.369                | 0.107           |
| Visceral<br>fat      | 0.113               |                 | 0.587             | 0.198               | 0.236                | 0.071           |
| Epicardial<br>fat    | 0.308               | <0.001          |                   | 0.057               | 0.278                | -0.039          |
| Intrahepatic<br>fat  | 0.047               | 0.255           | 0.742             |                     | -0.044               | 0.040           |
| Intramuscular<br>fat | 0.008               | 0.096           | 0.050             | 0.803               |                      | 0.017           |
| Plasma<br>FGF21      | 0.475               | 0.635           | 0.795             | 0.826               | 0.911                |                 |

D

| r<br>p-value         | Subcutaneous<br>fat | Visceral<br>fat | Epicardial<br>fat | Intrahepatic<br>fat | Intramuscular<br>fat | Plasma<br>FGF21 |
|----------------------|---------------------|-----------------|-------------------|---------------------|----------------------|-----------------|
| Subcutaneous<br>fat  |                     | 0.365           | 0.367             | 0.222               | 0.381                | 0.197           |
| Visceral<br>fat      | 0.001               |                 | 0.535             | 0.311               | 0.367                | 0.240           |
| Epicardial<br>fat    | 0.001               | <0.001          |                   | 0.352               | 0.484                | 0.336           |
| Intrahepatic<br>fat  | 0.086               | 0.015           | 0.006             |                     | 0.3156               | 0.308           |
| Intramuscular<br>fat | <0.001              | <0.001          | <0.001            | 0.227               |                      | 0.282           |
| Plasma<br>FGF21      | 0.102               | 0.046           | 0.004             | 0.028               | 0.017                |                 |

**Supplemental Figure 3** – Correlation between ectopic fat and FGF-21 levels in type 2 diabetes mellitus (T2DM) patients. A: Subcutaneous fat, B: Visceral fat, C: Epicardial fat, D: Intrahepatic fat, E: Intramuscular fat.

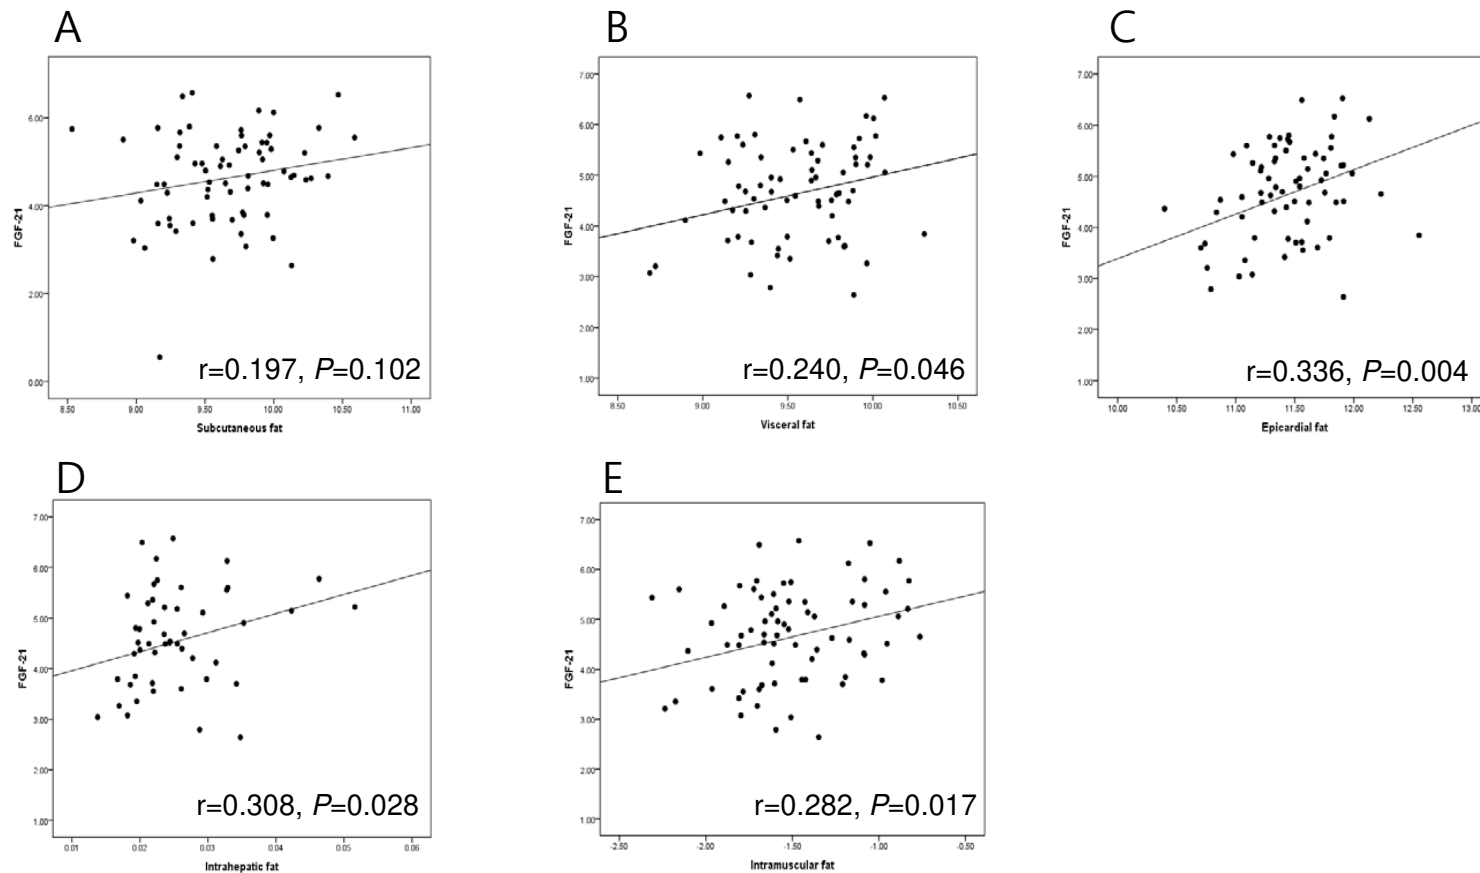

**Supplemental Figure 4** – Protein expression of the FGFR dimer and signaling components in visceral and subcutaneous fat tissue of the non-diabetic control group of subjects who underwent general abdominal surgery (Cohort 3). A: Western blot analysis, B: FGFR1, C:  $\beta$ -klotho, D: p-P38, E: p-ERK. V, VAT: visceral adipose tissue, S, SAT: subcutaneous adipose tissue. n=5/group. NS: nonsignificant.

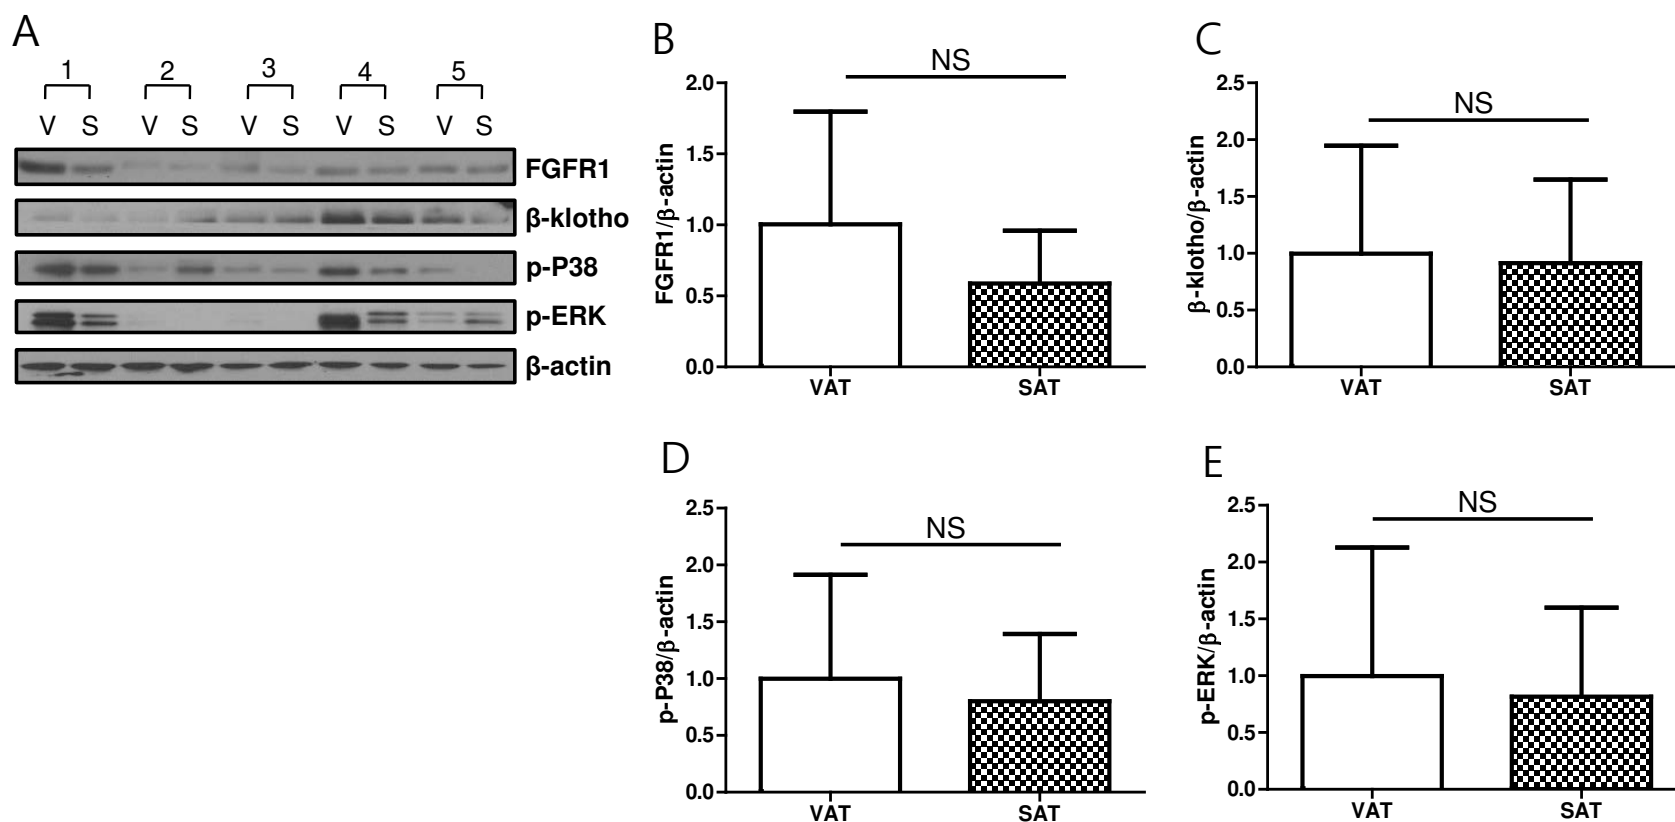



**Supplemental Figure 5** – Protein expression of the FGFR dimer and signaling components in visceral and subcutaneous fat tissue of the non-diabetic control group of subjects who underwent coronary artery bypass graft surgery (Cohort 2). A: Western blot analysis, B: FGFR1, C:  $\beta$ -klotho, D: p-P38, E: p-ERK. V, VAT: visceral adipose tissue, S, SAT: subcutaneous adipose tissue. n=5/group. NS: nonsignificant.

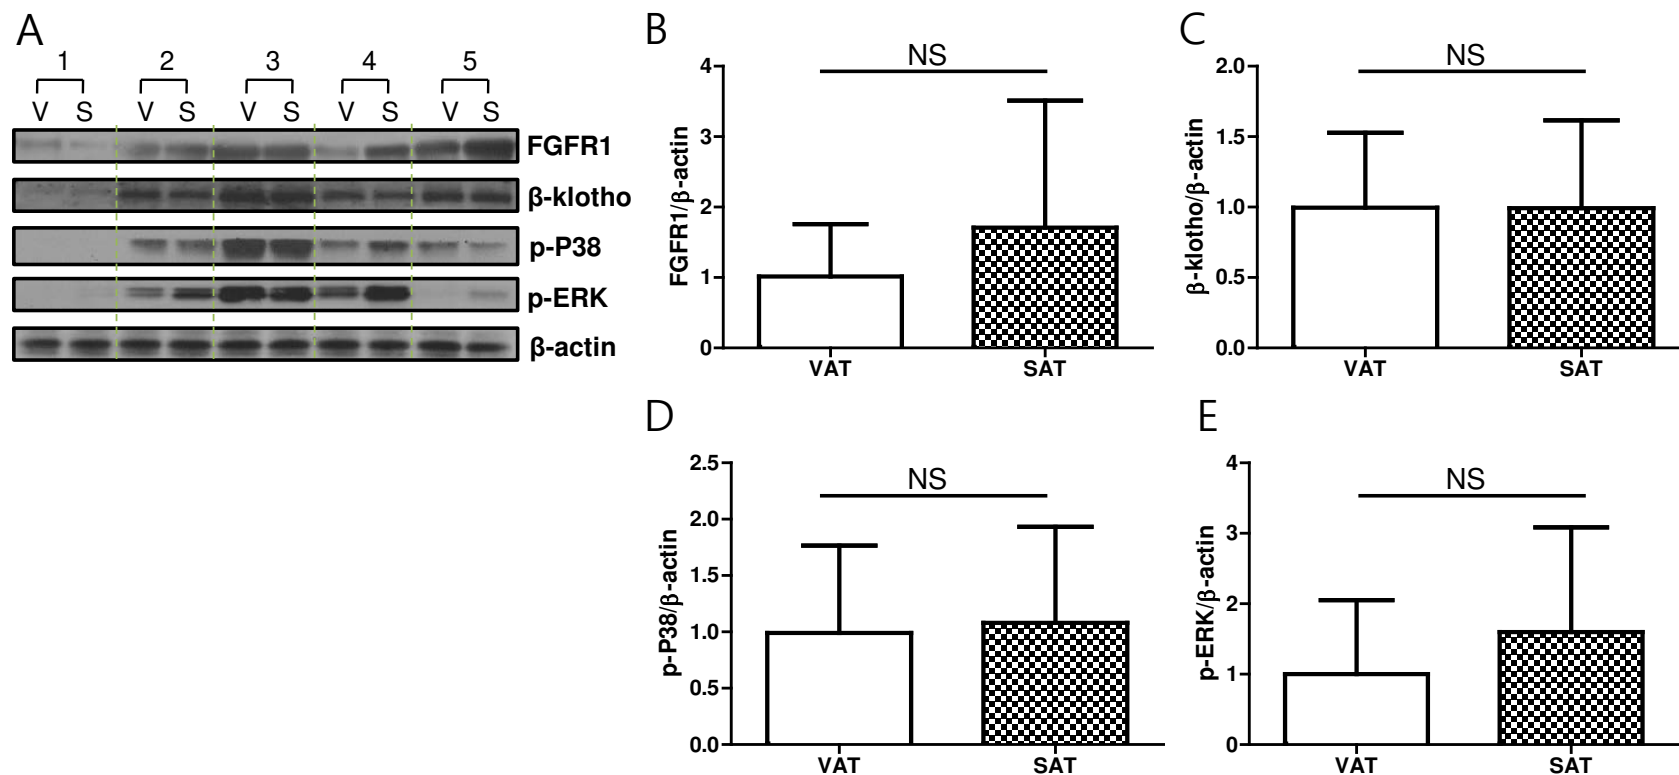

**Supplemental Figure 6** –mRNA expression of FGFR dimer and signaling components in visceral and subcutaneous fat tissue A: Non-diabetic control group of subjects who underwent general abdominal surgery (Cohort 3) B: Non-diabetic control group of subjects who underwent coronary artery bypass graft surgery (Cohort 2) C: Type 2 diabetes mellitus group of subjects who underwent coronary artery bypass graft surgery (Cohort 2). V: visceral adipose tissue, S: subcutaneous adipose tissue. N=3/group. NS: nonsignificant.

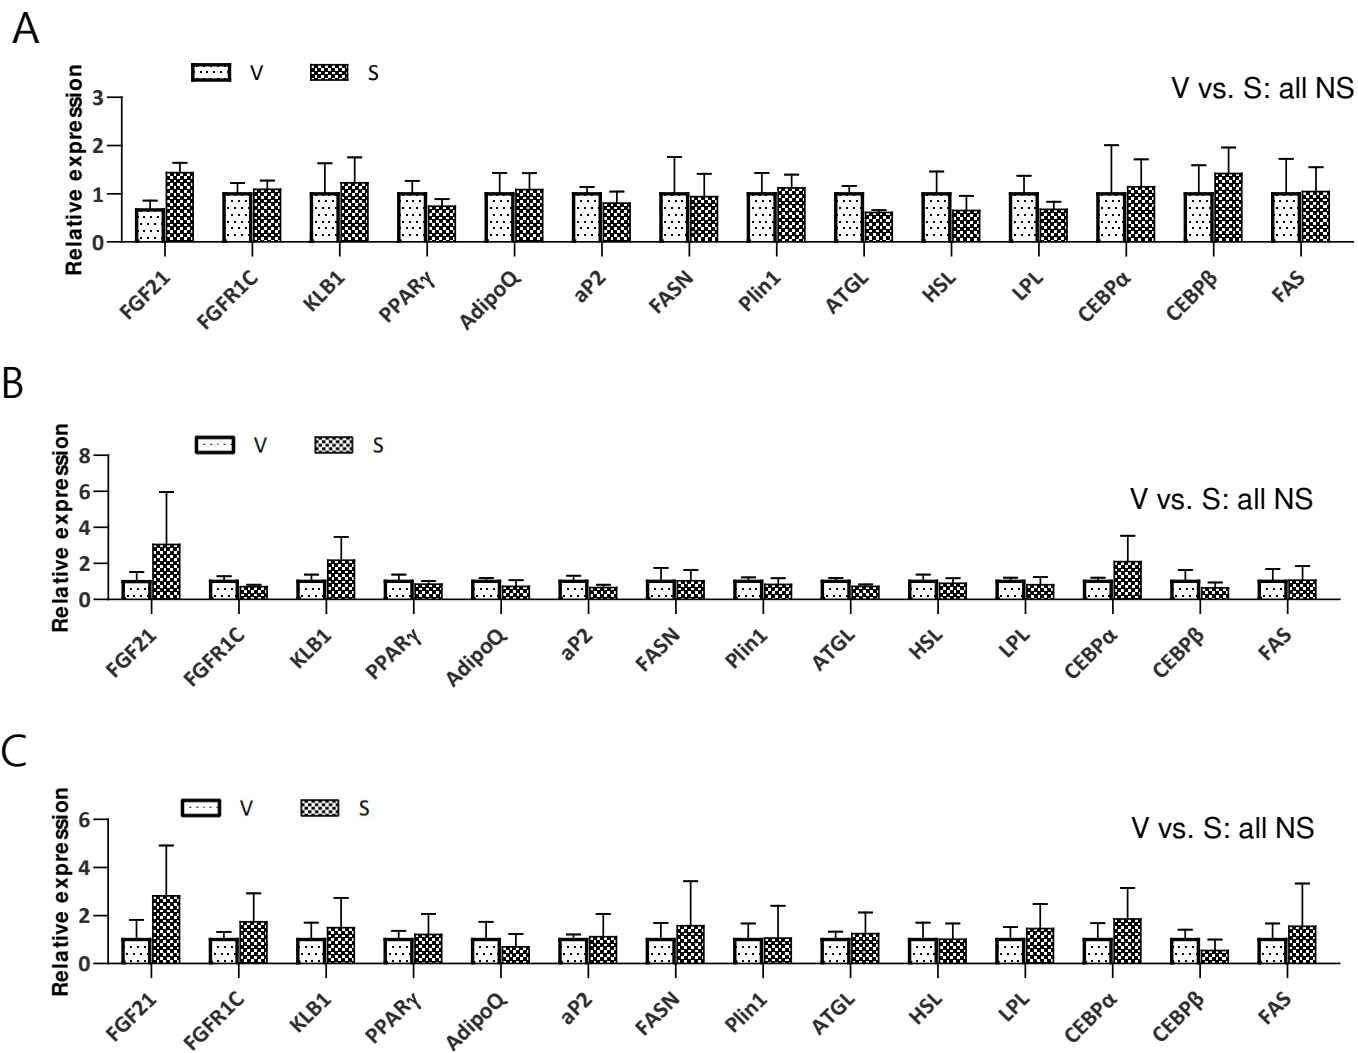

Supplement: bmjdrc-2019-000776supp001.pdf [file bmjdrc-2019-000776supp001.pdf]
