# Supplementary material for: Plasma fibroblast growth factor 21 levels increase with ectopic fat accumulation and its receptor levels are decreased in the visceral fat of patients with type 2 diabetes
Source: PubMed Central journal article supplement — BMJ Open Diabetes Res Care. 2019 Nov 17;7(1):e000776. doi: 10.1136/bmjdrc-2019-000776 (PMC6861080; doi:10.1136/bmjdrc-2019-000776), 2019-11-17
Supplement: bmjdrc-2019-000776supp002.pdf [file bmjdrc-2019-000776supp002.pdf]

Supplemental Table 1. The sequences of all primers.

| Primers       | Forward               | Reverse              |
|---------------|-----------------------|----------------------|
| FGF21         | AGATGCGGTCGCTTCTTTCA  | TGCGCCCCATCTGAATTTCT |
| FGFR1C        | ACAAGATGCTCTCCCTCCT   | GGGCATACGGTTTGGTTTGG |
| KLB           | CCAAACCGGTCGGAAAACAC  | CACATCTGGCGTGGACTCTT |
| PPAR $\gamma$ | TCTCAAACGAGAGTCAGCCTT | CACGGAGCTGATCCCAAAGT |
| AdipoQ        | GCAGTCTGTGGTTCTGATTC  | GCCCTTGAGTCGTGGTTTCC |
| aP2           | GCCTACACCCAGAGCTACCG  | GCCATGGTACTTGGCCTTG  |
| FASN          | TACTGGGCCAGGAATTTGAC  | GTGGAAGTGACGCCTTTCAT |
| Plin1         | CAGACCACCATGCACCTG    | GCTGTTCTTGTCCACCGACT |
| ATGL          | GTCAAGAGCAAGGCCAAGAA  | AGCTGCTCCACCTTCTTCTG |
| HSL           | AAGGCCTACAGGTGCAGTTC  | CCAGATTGTTGCAGCGGTTT |
| LPL           | ACCTGCCTTACATGGCTTGTT | CACGCCCTTCTCATAGGCAT |
| CEBP $\alpha$ | GTATGTGACCGCCTGCTTACT | GCAGGTTCCAAATGCCAGG  |
| CEBP $\beta$  | TGCTAGGCACATAGCCTCCT  | GCTGGGCTATGGGTGTCTTT |
| FAS           | GCCTACACCCAGAGCTACCG  | GCCATGGTACTTGGCCTTG  |
| Cyclophilin   | TCTGCACTGCCAAGACTGAG  | TCGAGTTGTCCACAGTCAGC |

Supplemental Table 2. Correlation between FGF21 and clinical parameters

| FGF21         | r     | p-value |
|---------------|-------|---------|
| Age           | -.108 | .174    |
| BMI           | .212  | .008    |
| SBP           | .123  | .125    |
| DBP           | .095  | .239    |
| T.chol        | .137  | .089    |
| TG            | .292  | .001    |
| HDL-C         | -.091 | .322    |
| LDL-C         | .182  | .049    |
| AST           | .047  | .564    |
| ALT           | .096  | .237    |
| FPG           | .145  | .069    |
| PP2           | .174  | .066    |
| HbA1c         | .119  | .147    |
| HOMA-IR       | .246  | .004    |
| Matsuda index | -.240 | .016    |

BMI, body mass index; SBP, systolic blood pressure; DBP, diastolic blood pressure; T.chol., total cholesterol; TG, triglyceride; HDL-C, high density lipoprotein cholesterol; LDL-C, low density lipoprotein cholesterol; AST, aspartate transaminase; ALT, alanine aminotransferase; FPG, fasting plasma glucose; PP2, postprandial 2-h glucose

Supplemental Table 3. Basal characteristics of subjects (cohort 2)

|                          | NGT<br>(n=17) | T2DM<br>(n=23) | <i>p-value</i> |
|--------------------------|---------------|----------------|----------------|
| Age (years)              | 65.4 ± 12.4   | 68.1 ± 8.6     | 0.408          |
| Male: Female             | 15 : 2        | 16 : 7         | 0.256          |
| BMI (kg/m <sup>2</sup> ) | 23.6 ± 2.2    | 24.5 ± 4.0     | 0.421          |
| SBP (mmHg)               | 127.7 ± 17.9  | 123.2 ± 17.7   | 0.436          |
| DBP (mmHg)               | 72.0 ± 11.1   | 69.7 ± 9.9     | 0.502          |
| T. chol. (mg/dL)         | 179.5 ± 43.5  | 164.7 ± 53.5   | 0.356          |
| TG (mg/dL)               | 142.7 ± 89.4  | 144.4 ± 130.0  | 0.966          |
| HDL-C (mg/dL)            | 51.5 ± 30.4   | 43.5 ± 11.5    | 0.301          |
| LDL-C (mg/dL)            | 106.4 ± 46.8  | 92.8 ± 33.2    | 0.343          |
| AST (IU/L)               | 35.8 ± 16.5   | 39.1 ± 26.3    | 0.886          |
| ALT (IU/L)               | 25.4 ± 14.2   | 32.1 ± 20.6    | 0.246          |
| FPG (mg/dL)              | 116.6 ± 42.5  | 185.8 ± 72.3   | 0.002          |
| HbA1c (%)                | 5.9 ± 0.7     | 7.9 ± 1.3      | < 0.001        |
| FGF21 (pg/mL)            | 178.4 ± 169.4 | 431.6 ± 371.1  | 0.009          |

Data are presented as mean ± SD; BMI, body mass index; SBP, systolic blood pressure; DBP, diastolic blood pressure; T.chol., total cholesterol; TG, triglyceride; HDL-C, high density lipoprotein cholesterol; LDL-C, low density lipoprotein cholesterol; AST, aspartate transaminase; ALT, alanine aminotransferase; FPG, fasting plasma glucose; ; FGF21, fibroblast growth factor 21

Supplemental Table 4. Ectopic fat accumulation according to glucose metabolism

|                                                      | NGT<br>(n=48) | Prediabetes<br>(n=53) | T2DM<br>(n=89) | <i>p-value</i> |
|------------------------------------------------------|---------------|-----------------------|----------------|----------------|
| Abdominal subcutaneous fat area (cm <sup>2</sup> )   | 178.9 ± 70.5  | 171.0 ± 63.3          | 164.6 ± 67.5   | 0.390          |
| Abdominal visceral fat area (cm <sup>2</sup> )       | 119.1 ± 53.6  | 140.0 ± 44.4*         | 148.1 ± 49.6†  | 0.001          |
| Pericardial fat volume (cm <sup>3</sup> )            | 83.5 ± 36.0   | 89.4 ± 35.1           | 98.6 ± 40.3†   | 0.042          |
| Liver-Spleen HU difference (HU)                      | 7.2 ± 9.1     | 4.7 ± 10.5            | 2.0 ± 11.3     | 0.059          |
| Mid-thigh low density muscle area (cm <sup>2</sup> ) | 34.2 ± 10.7   | 41.1 ± 12.4*          | 41.8 ± 15.3†   | 0.003          |

Data are presented as mean ± SD.

\* NGT vs. Prediabetes, † NGT vs. Type 2 diabetes, ‡ Prediabetes vs. Type 2 diabetes
